# Supplementary material for: Rapid and Reliable Analysis of Kojic Acid in Fungal Agar
Source: Research Square preprint supplement (doi:10.21203/rs.3.rs-1047138/v1), 2021-11-08
Supplement: Supplementary file 1 [file fa8aad350989938732bd79f8.xlsx]

## Sheet: Table1
Table 1 Recovery values of kojic acid spiked into blank medium
	Spiked amount		Recovery
Medium	(mg/kg)		Mean*(%)	±	SD (%)	RSDr (%)
YES	100		110	±	18	16
	2000		76.2	±	4.8	6.3
GY(2-0.5)	100		82.2	±	8.7	11
	2000		74	±	2.3	3.1
GY(5-0.5)	100		79.2	±	5.3	6.7
	2000		79.8	±	6.6	8.3
*Each value is shown in mean with SD of three replicates

## Sheet: Table2
Table 2 Kojic acid production of two Aspergillus isolates
	Medium		Mean*(mg/kg)	±	SD (mg/kg)
MAFF 111759	GY(2-0.5)		1360	±	130
(A. parasiticus)	GY(5-0.5)		14100	±	450
岸JUL1	GY(2-0.5)		1210	±	160
(A. flavus)	GY(5-0.5)		8800	±	140
*Each value is shown in mean with SD of three replicates
